# Supplementary material
Source: Springer Nature journal article supplement (https://www.springermedizin.de/resource/supplementary/13098_2014_370_MOESM1_ESM.pdf/9670912)

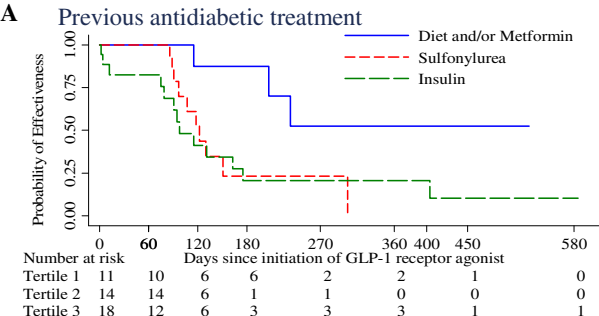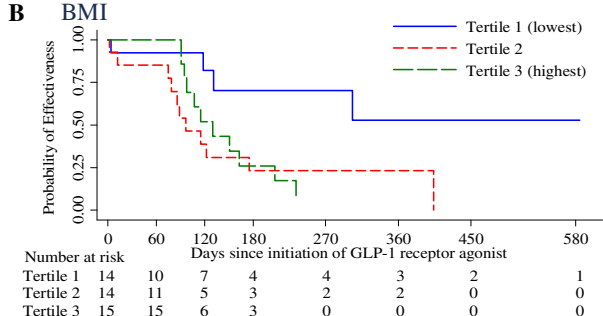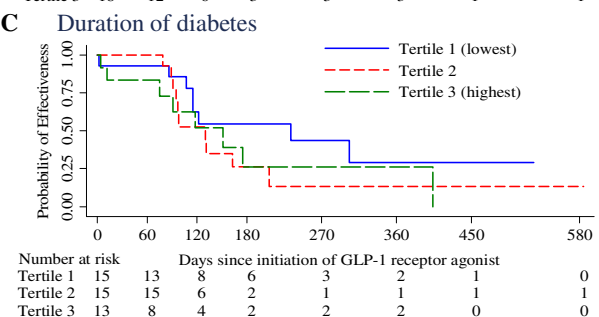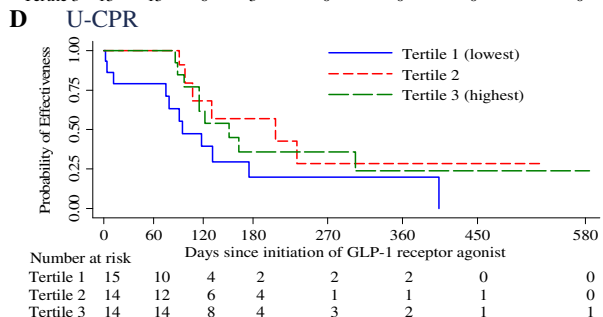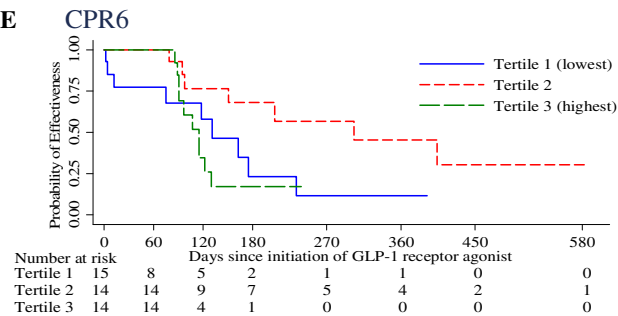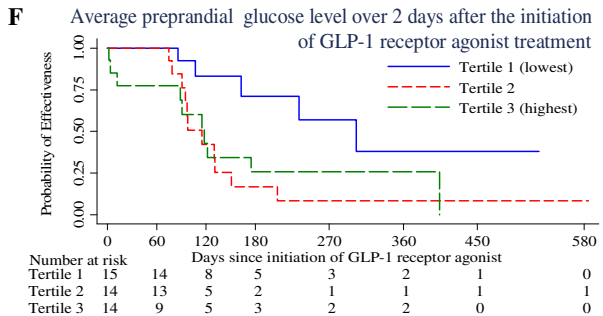

Supplement: MOESM1 [file 9670912]
